# Supplementary material for: Evaluating the impact of covariate lookback times on performance of patient-level prediction models
Source: BMC Med Res Methodol. 2021 Aug 28;21:180. doi: 10.1186/s12874-021-01370-2 (PMC8403343; doi:10.1186/s12874-021-01370-2)
Supplement: Supplementary file 1 — Additional file 1. [file 12874_2021_1370_MOESM1_ESM.xlsx]

## Sheet: target 16632 RI
[Methods JH] New users of hypertension drug after 2013 - excluding renal impairment
Cohort Entry Events
People with continuous observation of 365 days before event may enter the cohort when observing any of the following:
drug exposure of '[LEGEND HTN] Hypertension drugs' for the first time in the person's history, starting on or after January 1, 2013.
Limit cohort entry events to the earliest event per person.
Restrict entry events to with all of the following criteria:
having at least 1 condition occurrence of '[LEGEND HTN] Hypertensive disorder', starting between 365 days before and 0 days after cohort entry start date.
having no drug exposures of '[LEGEND HTN] Hypertension drugs', starting anytime prior to cohort entry start date.
Inclusion Criteria
1. No renal impairment prior to index
Entry events with all of the following criteria:
having no condition occurrences of '[Methods - JH] Renal Impairment', starting anytime on or before cohort entry start date; allow events outside observation period.
having no observations of '[Methods - JH] Renal Impairment', starting anytime on or before cohort entry start date; allow events outside observation period.
having no procedure occurrences of '[Methods - JH] Renal Impairment', starting anytime on or before cohort entry start date; allow events outside observation period.
Cohort Exit
The person exits the cohort at the end of continuous observation.
Cohort Eras
Entry events will be combined into cohort eras if they are within 0 days of each other.
Appendix 1: Concept Set Definitions
[LEGEND HTN] Hypertension drugs
Concept Id	Concept Name	Domain	Vocabulary	Excluded	Descendants	Mapped
1319998	Acebutolol	Drug	RxNorm	NO	YES	NO
1317967	aliskiren	Drug	RxNorm	NO	YES	NO
991382	Amiloride	Drug	RxNorm	NO	YES	NO
1332418	Amlodipine	Drug	RxNorm	NO	YES	NO
1314002	Atenolol	Drug	RxNorm	NO	YES	NO
40235485	azilsartan	Drug	RxNorm	NO	YES	NO
1335471	benazepril	Drug	RxNorm	NO	YES	NO
1322081	Betaxolol	Drug	RxNorm	NO	YES	NO
1338005	Bisoprolol	Drug	RxNorm	NO	YES	NO
932745	Bumetanide	Drug	RxNorm	NO	YES	NO
1351557	candesartan	Drug	RxNorm	NO	YES	NO
1340128	Captopril	Drug	RxNorm	NO	YES	NO
1346823	carvedilol	Drug	RxNorm	NO	YES	NO
1395058	Chlorthalidone	Drug	RxNorm	NO	YES	NO
1398937	Clonidine	Drug	RxNorm	NO	YES	NO
1328165	Diltiazem	Drug	RxNorm	NO	YES	NO
1363053	Doxazosin	Drug	RxNorm	NO	YES	NO
1341927	Enalapril	Drug	RxNorm	NO	YES	NO
1309799	eplerenone	Drug	RxNorm	NO	YES	NO
1346686	eprosartan	Drug	RxNorm	NO	YES	NO
1353776	Felodipine	Drug	RxNorm	NO	YES	NO
1363749	Fosinopril	Drug	RxNorm	NO	YES	NO
956874	Furosemide	Drug	RxNorm	NO	YES	NO
1344965	Guanfacine	Drug	RxNorm	NO	YES	NO
1373928	Hydralazine	Drug	RxNorm	NO	YES	NO
974166	Hydrochlorothiazide	Drug	RxNorm	NO	YES	NO
978555	Indapamide	Drug	RxNorm	NO	YES	NO
1347384	irbesartan	Drug	RxNorm	NO	YES	NO
1326012	Isradipine	Drug	RxNorm	NO	YES	NO
1386957	Labetalol	Drug	RxNorm	NO	YES	NO
1308216	Lisinopril	Drug	RxNorm	NO	YES	NO
1367500	Losartan	Drug	RxNorm	NO	YES	NO
1305447	Methyldopa	Drug	RxNorm	NO	YES	NO
907013	Metolazone	Drug	RxNorm	NO	YES	NO
1307046	Metoprolol	Drug	RxNorm	NO	YES	NO
1309068	Minoxidil	Drug	RxNorm	NO	YES	NO
1310756	moexipril	Drug	RxNorm	NO	YES	NO
1313200	Nadolol	Drug	RxNorm	NO	YES	NO
1314577	nebivolol	Drug	RxNorm	NO	YES	NO
1318137	Nicardipine	Drug	RxNorm	NO	YES	NO
1318853	Nifedipine	Drug	RxNorm	NO	YES	NO
1319880	Nisoldipine	Drug	RxNorm	NO	YES	NO
40226742	olmesartan	Drug	RxNorm	NO	YES	NO
1327978	Penbutolol	Drug	RxNorm	NO	YES	NO
1373225	Perindopril	Drug	RxNorm	NO	YES	NO
1345858	Pindolol	Drug	RxNorm	NO	YES	NO
1350489	Prazosin	Drug	RxNorm	NO	YES	NO
1353766	Propranolol	Drug	RxNorm	NO	YES	NO
1331235	quinapril	Drug	RxNorm	NO	YES	NO
1334456	Ramipril	Drug	RxNorm	NO	YES	NO
970250	Spironolactone	Drug	RxNorm	NO	YES	NO
1317640	telmisartan	Drug	RxNorm	NO	YES	NO
1341238	Terazosin	Drug	RxNorm	NO	YES	NO
942350	torsemide	Drug	RxNorm	NO	YES	NO
1342439	trandolapril	Drug	RxNorm	NO	YES	NO
904542	Triamterene	Drug	RxNorm	NO	YES	NO
1308842	valsartan	Drug	RxNorm	NO	YES	NO
1307863	Verapamil	Drug	RxNorm	NO	YES	NO
[LEGEND HTN] Hypertensive disorder
Concept Id	Concept Name	Domain	Vocabulary	Excluded	Descendants	Mapped
316866	Hypertensive disorder	Condition	SNOMED	NO	YES	NO
[Methods - JH] Renal Impairment
Concept Id	Concept Name	Domain	Vocabulary	Excluded	Descendants	Mapped
432961	Acute renal papillary necrosis with renal failure	Condition	SNOMED	NO	YES	NO
444044	Acute tubular necrosis	Condition	SNOMED	NO	YES	NO
45768812	Anemia in chronic kidney disease	Condition	SNOMED	NO	YES	NO
1314323	Dialysis procedure at a medicare certified esrd facility for acute kidney injury without esrd	Procedure	HCPCS	NO	YES	NO
44786436	Documentation of end stage renal disease (esrd), dialysis, renal transplant before or during the measurement period or pregnancy during the measurement period	Observation	HCPCS	NO	YES	NO
2106278	Documentation of treatment for nephropathy (eg, patient receiving dialysis, patient being treated for ESRD, CRF, ARF, or renal insufficiency, any visit to a nephrologist) (DM)	Observation	CPT4	NO	YES	NO
2617397	END STAGE RENAL DISEASE (ESRD) RELATED SERVICES DURING THE COURSE OF TREATMENT, FOR PATIENTS 20 YEARS OF AGE AND OVER; WITH 1 FACE-TO-FACE PHYSICIAN VISIT PER MONTH	Observation	HCPCS	NO	YES	NO
2617396	END STAGE RENAL DISEASE (ESRD) RELATED SERVICES DURING THE COURSE OF TREATMENT, FOR PATIENTS 20 YEARS OF AGE AND OVER; WITH 2 OR 3 FACE-TO-FACE PHYSICIAN VISITS PER MONTH	Observation	HCPCS	NO	YES	NO
2617395	END STAGE RENAL DISEASE (ESRD) RELATED SERVICES DURING THE COURSE OF TREATMENT, FOR PATIENTS 20 YEARS OF AGE AND OVER; WITH 4 OR MORE FACE-TO-FACE PHYSICIAN VISITS PER MONTH	Observation	HCPCS	NO	YES	NO
2213596	End-stage renal disease (ESRD) related services for dialysis less than a full month of service, per day; for patients 12-19 years of age	Observation	CPT4	NO	YES	NO
2213597	End-stage renal disease (ESRD) related services for dialysis less than a full month of service, per day; for patients 20 years of age and older	Observation	CPT4	NO	YES	NO
2213595	End-stage renal disease (ESRD) related services for dialysis less than a full month of service, per day; for patients 2-11 years of age	Observation	CPT4	NO	YES	NO
2213594	End-stage renal disease (ESRD) related services for dialysis less than a full month of service, per day; for patients younger than 2 years of age	Observation	CPT4	NO	YES	NO
2617401	END STAGE RENAL DISEASE (ESRD) RELATED SERVICES FOR HOME DIALYSIS PATIENTS PER FULL MONTH; FOR PATIENTS TWENTY YEARS OF AGE AND OLDER	Observation	HCPCS	NO	YES	NO
2213592	End-stage renal disease (ESRD) related services for home dialysis per full month, for patients 12-19 years of age to include monitoring for the adequacy of nutrition, assessment of growth and development, and counseling of parents	Observation	CPT4	NO	YES	NO
2213593	End-stage renal disease (ESRD) related services for home dialysis per full month, for patients 20 years of age and older	Observation	CPT4	NO	YES	NO
2213591	End-stage renal disease (ESRD) related services for home dialysis per full month, for patients 2-11 years of age to include monitoring for the adequacy of nutrition, assessment of growth and development, and counseling of parents	Observation	CPT4	NO	YES	NO
42738678	End-stage renal disease (ESRD) related services (less than full month), per day; for patients between twelve and nineteen years of age	Procedure	CPT4	NO	YES	NO
42738677	End-stage renal disease (ESRD) related services (less than full month), per day; for patients between two and eleven years of age	Procedure	CPT4	NO	YES	NO
42738679	End-stage renal disease (ESRD) related services (less than full month), per day; for patients twenty years of age and older	Procedure	CPT4	NO	YES	NO
2617405	END STAGE RENAL DISEASE (ESRD) RELATED SERVICES LESS THAN FULL MONTH, PER DAY; FOR PATIENTS TWENTY YEARS OF AGE AND OVER	Observation	HCPCS	NO	YES	NO
42738676	End-stage renal disease (ESRD) related services (less than full month), per day; for patients younger than two years of age	Procedure	CPT4	NO	YES	NO
2213584	End-stage renal disease (ESRD) related services monthly, for patients 12-19 years of age to include monitoring for the adequacy of nutrition, assessment of growth and development, and counseling of parents; with 4 or more face-to-face visits by a physicia	Observation	CPT4	NO	YES	NO
2213589	End-stage renal disease (ESRD) related services monthly, for patients 20 years of age and older; with 1 face-to-face visit by a physician or other qualified health care professional per month	Observation	CPT4	NO	YES	NO
2213588	End-stage renal disease (ESRD) related services monthly, for patients 20 years of age and older; with 2-3 face-to-face visits by a physician or other qualified health care professional per month	Observation	CPT4	NO	YES	NO
2213587	End-stage renal disease (ESRD) related services monthly, for patients 20 years of age and older; with 4 or more face-to-face visits by a physician or other qualified health care professional per month	Observation	CPT4	NO	YES	NO
42738338	End-stage renal disease (ESRD) related services per full month; for patients between twelve and nineteen years of age to include monitoring for the adequacy of nutrition, assessment of growth and development, and counseling of parents	Procedure	CPT4	NO	YES	NO
42738339	End-stage renal disease (ESRD) related services per full month; for patients twenty years of age and older	Procedure	CPT4	NO	YES	NO
2617544	End stage renal disease patient with documented dialysis dose of urr greater than or equal to 65% (or kt/v greater than or equal to 1.2)	Observation	HCPCS	NO	YES	NO
2617547	End stage renal disease patient with documented hematocrit greater than or equal to 33 (or hemoglobin greater than or equal to 11)	Observation	HCPCS	NO	YES	NO
45757744	Extrarenal uremia	Condition	SNOMED	NO	YES	NO
40660436	Face-to-face educational services related to the care of chronic kidney disease; individual, per session, per one hour	Procedure	HCPCS	NO	YES	NO
4035437	Gout secondary to renal impairment	Condition	SNOMED	NO	YES	NO
133810	Hyperparathyroidism due to renal insufficiency	Condition	SNOMED	NO	YES	NO
195556	Hypertensive heart AND renal disease	Condition	SNOMED	NO	YES	NO
439696	Hypertensive heart and renal disease with (congestive) heart failure	Condition	SNOMED	NO	YES	NO
193519	Impaired renal function disorder	Condition	SNOMED	NO	YES	NO
192279	Kidney disorder due to diabetes mellitus	Condition	SNOMED	NO	YES	NO
4030518	Renal impairment	Condition	SNOMED	NO	YES	NO
197921	Renal osteodystrophy	Condition	SNOMED	NO	YES	NO
438658	Traumatic anuria	Condition	SNOMED	NO	YES	NO

## Sheet: outcome 16475 RI
[Methods_JH] Renal impairment
Cohort Entry Events
People enter the cohort when observing any of the following:
condition occurrence of '[Methods - JH] Renal Impairment' for the first time in the person's history.
observation of '[Methods - JH] Renal Impairment' for the first time in the person's history.
procedure occurrence of '[Methods - JH] Renal Impairment' for the first time in the person's history.
Limit cohort entry events to the earliest event per person.
Cohort Exit
The person exits the cohort at the end of continuous observation.
Cohort Eras
Entry events will be combined into cohort eras if they are within 0 days of each other.
Appendix 1: Concept Set Definitions
[Methods - JH] Renal Impairment
Concept Id	Concept Name	Domain	Vocabulary	Excluded	Descendants	Mapped
432961	Acute renal papillary necrosis with renal failure	Condition	SNOMED	NO	YES	NO
444044	Acute tubular necrosis	Condition	SNOMED	NO	YES	NO
45768812	Anemia in chronic kidney disease	Condition	SNOMED	NO	YES	NO
1314323	Dialysis procedure at a medicare certified esrd facility for acute kidney injury without esrd	Procedure	HCPCS	NO	YES	NO
44786436	Documentation of end stage renal disease (esrd), dialysis, renal transplant before or during the measurement period or pregnancy during the measurement period	Observation	HCPCS	NO	YES	NO
2106278	Documentation of treatment for nephropathy (eg, patient receiving dialysis, patient being treated for ESRD, CRF, ARF, or renal insufficiency, any visit to a nephrologist) (DM)	Observation	CPT4	NO	YES	NO
2617397	END STAGE RENAL DISEASE (ESRD) RELATED SERVICES DURING THE COURSE OF TREATMENT, FOR PATIENTS 20 YEARS OF AGE AND OVER; WITH 1 FACE-TO-FACE PHYSICIAN VISIT PER MONTH	Observation	HCPCS	NO	YES	NO
2617396	END STAGE RENAL DISEASE (ESRD) RELATED SERVICES DURING THE COURSE OF TREATMENT, FOR PATIENTS 20 YEARS OF AGE AND OVER; WITH 2 OR 3 FACE-TO-FACE PHYSICIAN VISITS PER MONTH	Observation	HCPCS	NO	YES	NO
2617395	END STAGE RENAL DISEASE (ESRD) RELATED SERVICES DURING THE COURSE OF TREATMENT, FOR PATIENTS 20 YEARS OF AGE AND OVER; WITH 4 OR MORE FACE-TO-FACE PHYSICIAN VISITS PER MONTH	Observation	HCPCS	NO	YES	NO
2213596	End-stage renal disease (ESRD) related services for dialysis less than a full month of service, per day; for patients 12-19 years of age	Observation	CPT4	NO	YES	NO
2213597	End-stage renal disease (ESRD) related services for dialysis less than a full month of service, per day; for patients 20 years of age and older	Observation	CPT4	NO	YES	NO
2213595	End-stage renal disease (ESRD) related services for dialysis less than a full month of service, per day; for patients 2-11 years of age	Observation	CPT4	NO	YES	NO
2213594	End-stage renal disease (ESRD) related services for dialysis less than a full month of service, per day; for patients younger than 2 years of age	Observation	CPT4	NO	YES	NO
2617401	END STAGE RENAL DISEASE (ESRD) RELATED SERVICES FOR HOME DIALYSIS PATIENTS PER FULL MONTH; FOR PATIENTS TWENTY YEARS OF AGE AND OLDER	Observation	HCPCS	NO	YES	NO
2213592	End-stage renal disease (ESRD) related services for home dialysis per full month, for patients 12-19 years of age to include monitoring for the adequacy of nutrition, assessment of growth and development, and counseling of parents	Observation	CPT4	NO	YES	NO
2213593	End-stage renal disease (ESRD) related services for home dialysis per full month, for patients 20 years of age and older	Observation	CPT4	NO	YES	NO
2213591	End-stage renal disease (ESRD) related services for home dialysis per full month, for patients 2-11 years of age to include monitoring for the adequacy of nutrition, assessment of growth and development, and counseling of parents	Observation	CPT4	NO	YES	NO
42738678	End-stage renal disease (ESRD) related services (less than full month), per day; for patients between twelve and nineteen years of age	Procedure	CPT4	NO	YES	NO
42738677	End-stage renal disease (ESRD) related services (less than full month), per day; for patients between two and eleven years of age	Procedure	CPT4	NO	YES	NO
42738679	End-stage renal disease (ESRD) related services (less than full month), per day; for patients twenty years of age and older	Procedure	CPT4	NO	YES	NO
2617405	END STAGE RENAL DISEASE (ESRD) RELATED SERVICES LESS THAN FULL MONTH, PER DAY; FOR PATIENTS TWENTY YEARS OF AGE AND OVER	Observation	HCPCS	NO	YES	NO
42738676	End-stage renal disease (ESRD) related services (less than full month), per day; for patients younger than two years of age	Procedure	CPT4	NO	YES	NO
2213584	End-stage renal disease (ESRD) related services monthly, for patients 12-19 years of age to include monitoring for the adequacy of nutrition, assessment of growth and development, and counseling of parents; with 4 or more face-to-face visits by a physicia	Observation	CPT4	NO	YES	NO
2213589	End-stage renal disease (ESRD) related services monthly, for patients 20 years of age and older; with 1 face-to-face visit by a physician or other qualified health care professional per month	Observation	CPT4	NO	YES	NO
2213588	End-stage renal disease (ESRD) related services monthly, for patients 20 years of age and older; with 2-3 face-to-face visits by a physician or other qualified health care professional per month	Observation	CPT4	NO	YES	NO
2213587	End-stage renal disease (ESRD) related services monthly, for patients 20 years of age and older; with 4 or more face-to-face visits by a physician or other qualified health care professional per month	Observation	CPT4	NO	YES	NO
42738338	End-stage renal disease (ESRD) related services per full month; for patients between twelve and nineteen years of age to include monitoring for the adequacy of nutrition, assessment of growth and development, and counseling of parents	Procedure	CPT4	NO	YES	NO
42738339	End-stage renal disease (ESRD) related services per full month; for patients twenty years of age and older	Procedure	CPT4	NO	YES	NO
2617544	End stage renal disease patient with documented dialysis dose of urr greater than or equal to 65% (or kt/v greater than or equal to 1.2)	Observation	HCPCS	NO	YES	NO
2617547	End stage renal disease patient with documented hematocrit greater than or equal to 33 (or hemoglobin greater than or equal to 11)	Observation	HCPCS	NO	YES	NO
45757744	Extrarenal uremia	Condition	SNOMED	NO	YES	NO
40660436	Face-to-face educational services related to the care of chronic kidney disease; individual, per session, per one hour	Procedure	HCPCS	NO	YES	NO
4035437	Gout secondary to renal impairment	Condition	SNOMED	NO	YES	NO
133810	Hyperparathyroidism due to renal insufficiency	Condition	SNOMED	NO	YES	NO
439696	Hypertensive heart and renal disease with (congestive) heart failure	Condition	SNOMED	NO	YES	NO
193519	Impaired renal function disorder	Condition	SNOMED	NO	YES	NO
192279	Kidney disorder due to diabetes mellitus	Condition	SNOMED	NO	YES	NO
4030518	Renal impairment	Condition	SNOMED	NO	YES	NO
197921	Renal osteodystrophy	Condition	SNOMED	NO	YES	NO
438658	Traumatic anuria	Condition	SNOMED	NO	YES	NO
195556	Hypertensive heart AND renal disease	Condition	SNOMED	NO	YES	NO

## Sheet: target 16629 GI
[Methods JH] New users of hypertension drug after 2013 - excluding GI bleed
Cohort Entry Events
People with continuous observation of 365 days before event may enter the cohort when observing any of the following:
drug exposure of '[LEGEND HTN] Hypertension drugs' for the first time in the person's history, starting on or after January 1, 2013.
Limit cohort entry events to the earliest event per person.
Restrict entry events to with all of the following criteria:
having at least 1 condition occurrence of '[LEGEND HTN] Hypertensive disorder', starting between 365 days before and 0 days after cohort entry start date.
having no drug exposures of '[LEGEND HTN] Hypertension drugs', starting anytime prior to cohort entry start date.
Inclusion Criteria
1. No GI bleeding 60 days prior to index
Entry events with all of the following criteria:
having no condition occurrences of '[Methods JH] Gastrointestinal hemorrhage GI bleeding', starting between 60 days before and 0 days before cohort entry start date.
having no procedure occurrences of '[Methods JH] Gastrointestinal hemorrhage GI bleeding', starting between 60 days before and 0 days before cohort entry start date.
Cohort Exit
The person exits the cohort at the end of continuous observation.
Cohort Eras
Entry events will be combined into cohort eras if they are within 0 days of each other.
Appendix 1: Concept Set Definitions
[LEGEND HTN] Hypertension drugs
Concept Id	Concept Name	Domain	Vocabulary	Excluded	Descendants	Mapped
1319998	Acebutolol	Drug	RxNorm	NO	YES	NO
1317967	aliskiren	Drug	RxNorm	NO	YES	NO
991382	Amiloride	Drug	RxNorm	NO	YES	NO
1332418	Amlodipine	Drug	RxNorm	NO	YES	NO
1314002	Atenolol	Drug	RxNorm	NO	YES	NO
40235485	azilsartan	Drug	RxNorm	NO	YES	NO
1335471	benazepril	Drug	RxNorm	NO	YES	NO
1322081	Betaxolol	Drug	RxNorm	NO	YES	NO
1338005	Bisoprolol	Drug	RxNorm	NO	YES	NO
932745	Bumetanide	Drug	RxNorm	NO	YES	NO
1351557	candesartan	Drug	RxNorm	NO	YES	NO
1340128	Captopril	Drug	RxNorm	NO	YES	NO
1346823	carvedilol	Drug	RxNorm	NO	YES	NO
1395058	Chlorthalidone	Drug	RxNorm	NO	YES	NO
1398937	Clonidine	Drug	RxNorm	NO	YES	NO
1328165	Diltiazem	Drug	RxNorm	NO	YES	NO
1363053	Doxazosin	Drug	RxNorm	NO	YES	NO
1341927	Enalapril	Drug	RxNorm	NO	YES	NO
1309799	eplerenone	Drug	RxNorm	NO	YES	NO
1346686	eprosartan	Drug	RxNorm	NO	YES	NO
1353776	Felodipine	Drug	RxNorm	NO	YES	NO
1363749	Fosinopril	Drug	RxNorm	NO	YES	NO
956874	Furosemide	Drug	RxNorm	NO	YES	NO
1344965	Guanfacine	Drug	RxNorm	NO	YES	NO
1373928	Hydralazine	Drug	RxNorm	NO	YES	NO
974166	Hydrochlorothiazide	Drug	RxNorm	NO	YES	NO
978555	Indapamide	Drug	RxNorm	NO	YES	NO
1347384	irbesartan	Drug	RxNorm	NO	YES	NO
1326012	Isradipine	Drug	RxNorm	NO	YES	NO
1386957	Labetalol	Drug	RxNorm	NO	YES	NO
1308216	Lisinopril	Drug	RxNorm	NO	YES	NO
1367500	Losartan	Drug	RxNorm	NO	YES	NO
1305447	Methyldopa	Drug	RxNorm	NO	YES	NO
907013	Metolazone	Drug	RxNorm	NO	YES	NO
1307046	Metoprolol	Drug	RxNorm	NO	YES	NO
1309068	Minoxidil	Drug	RxNorm	NO	YES	NO
1310756	moexipril	Drug	RxNorm	NO	YES	NO
1313200	Nadolol	Drug	RxNorm	NO	YES	NO
1314577	nebivolol	Drug	RxNorm	NO	YES	NO
1318137	Nicardipine	Drug	RxNorm	NO	YES	NO
1318853	Nifedipine	Drug	RxNorm	NO	YES	NO
1319880	Nisoldipine	Drug	RxNorm	NO	YES	NO
40226742	olmesartan	Drug	RxNorm	NO	YES	NO
1327978	Penbutolol	Drug	RxNorm	NO	YES	NO
1373225	Perindopril	Drug	RxNorm	NO	YES	NO
1345858	Pindolol	Drug	RxNorm	NO	YES	NO
1350489	Prazosin	Drug	RxNorm	NO	YES	NO
1353766	Propranolol	Drug	RxNorm	NO	YES	NO
1331235	quinapril	Drug	RxNorm	NO	YES	NO
1334456	Ramipril	Drug	RxNorm	NO	YES	NO
970250	Spironolactone	Drug	RxNorm	NO	YES	NO
1317640	telmisartan	Drug	RxNorm	NO	YES	NO
1341238	Terazosin	Drug	RxNorm	NO	YES	NO
942350	torsemide	Drug	RxNorm	NO	YES	NO
1342439	trandolapril	Drug	RxNorm	NO	YES	NO
904542	Triamterene	Drug	RxNorm	NO	YES	NO
1308842	valsartan	Drug	RxNorm	NO	YES	NO
1307863	Verapamil	Drug	RxNorm	NO	YES	NO
[LEGEND HTN] Hypertensive disorder
Concept Id	Concept Name	Domain	Vocabulary	Excluded	Descendants	Mapped
316866	Hypertensive disorder	Condition	SNOMED	NO	YES	NO
[Methods JH] Gastrointestinal hemorrhage GI bleeding
Concept Id	Concept Name	Domain	Vocabulary	Excluded	Descendants	Mapped
4138962	Acute duodenal ulcer without hemorrhage AND without perforation	Condition	SNOMED	YES	YES	NO
4195231	Acute gastric ulcer without hemorrhage AND without perforation	Condition	SNOMED	YES	YES	NO
4163865	Acute peptic ulcer without hemorrhage AND without perforation	Condition	SNOMED	YES	YES	NO
195584	Acute peptic ulcer without hemorrhage AND without perforation but with obstruction	Condition	SNOMED	YES	YES	NO
40482685	Angiodysplasia of duodenum	Condition	SNOMED	NO	YES	NO
28779	Bleeding esophageal varices	Condition	SNOMED	NO	YES	NO
4222896	Chronic duodenal ulcer without hemorrhage AND without perforation	Condition	SNOMED	YES	YES	NO
4296611	Chronic gastric ulcer without hemorrhage AND without perforation	Condition	SNOMED	YES	YES	NO
200769	Chronic gastric ulcer without hemorrhage, without perforation AND without obstruction	Condition	SNOMED	YES	YES	NO
4177387	Chronic gastrojejunal ulcer without hemorrhage AND without perforation	Condition	SNOMED	YES	YES	NO
434400	Chronic gastrojejunal ulcer without hemorrhage AND without perforation but with obstruction	Condition	SNOMED	YES	YES	NO
438795	Chronic gastrojejunal ulcer without hemorrhage, without perforation AND without obstruction	Condition	SNOMED	YES	YES	NO
4204555	Chronic peptic ulcer without hemorrhage AND without perforation	Condition	SNOMED	YES	YES	NO
24973	Chronic peptic ulcer without hemorrhage AND without perforation but with obstruction	Condition	SNOMED	YES	YES	NO
23808	Chronic peptic ulcer without hemorrhage, without perforation AND without obstruction	Condition	SNOMED	YES	YES	NO
2002608	Control of hemorrhage and suture of ulcer of stomach or duodenum	Procedure	ICD9Proc	NO	YES	NO
198798	Dieulafoy's vascular malformation	Condition	SNOMED	NO	YES	NO
4209746	Duodenal ulcer without hemorrhage AND without perforation	Condition	SNOMED	YES	YES	NO
4112183	Esophageal varices with bleeding, associated with another disorder	Condition	SNOMED	NO	YES	NO
2108900	Esophagogastroduodenoscopy, flexible, transoral; with control of bleeding, any method	Procedure	CPT4	NO	YES	NO
2108878	Esophagoscopy, flexible, transoral; with control of bleeding, any method	Procedure	CPT4	NO	YES	NO
4248429	Gastric ulcer without hemorrhage AND without perforation	Condition	SNOMED	YES	YES	NO
192671	Gastrointestinal hemorrhage	Condition	SNOMED	NO	YES	NO
4101104	Gastrojejunal ulcer without hemorrhage AND without perforation	Condition	SNOMED	YES	YES	NO
443530	Hematochezia	Condition	SNOMED	NO	YES	NO
4103703	Melena	Condition	SNOMED	NO	YES	NO
4048608	Neonatal melena	Condition	SNOMED	NO	YES	NO
4027663	Peptic ulcer	Condition	SNOMED	NO	YES	NO
4291028	Peptic ulcer without hemorrhage AND without perforation	Condition	SNOMED	YES	YES	NO

## Sheet: outcome 16452 GI 
[LEGEND HTN] Gastrointestinal bleeding events, no IP or ER visit
Cohort Entry Events
People enter the cohort when observing any of the following:
condition occurrences of '[Methods JH] Gastrointestinal hemorrhage GI bleeding'.
procedure occurrences of '[Methods JH] Gastrointestinal hemorrhage GI bleeding'.
Cohort Exit
The cohort end date will be offset from index event's start date plus 7 days.
Cohort Eras
Entry events will be combined into cohort eras if they are within 30 days of each other.
Appendix 1: Concept Set Definitions
[Methods JH] Gastrointestinal hemorrhage GI bleeding
Concept Id	Concept Name	Domain	Vocabulary	Excluded	Descendants	Mapped
4138962	Acute duodenal ulcer without hemorrhage AND without perforation	Condition	SNOMED	YES	YES	NO
4195231	Acute gastric ulcer without hemorrhage AND without perforation	Condition	SNOMED	YES	YES	NO
4163865	Acute peptic ulcer without hemorrhage AND without perforation	Condition	SNOMED	YES	YES	NO
195584	Acute peptic ulcer without hemorrhage AND without perforation but with obstruction	Condition	SNOMED	YES	YES	NO
40482685	Angiodysplasia of duodenum	Condition	SNOMED	NO	YES	NO
28779	Bleeding esophageal varices	Condition	SNOMED	NO	YES	NO
4222896	Chronic duodenal ulcer without hemorrhage AND without perforation	Condition	SNOMED	YES	YES	NO
4296611	Chronic gastric ulcer without hemorrhage AND without perforation	Condition	SNOMED	YES	YES	NO
200769	Chronic gastric ulcer without hemorrhage, without perforation AND without obstruction	Condition	SNOMED	YES	YES	NO
4177387	Chronic gastrojejunal ulcer without hemorrhage AND without perforation	Condition	SNOMED	YES	YES	NO
434400	Chronic gastrojejunal ulcer without hemorrhage AND without perforation but with obstruction	Condition	SNOMED	YES	YES	NO
438795	Chronic gastrojejunal ulcer without hemorrhage, without perforation AND without obstruction	Condition	SNOMED	YES	YES	NO
4204555	Chronic peptic ulcer without hemorrhage AND without perforation	Condition	SNOMED	YES	YES	NO
24973	Chronic peptic ulcer without hemorrhage AND without perforation but with obstruction	Condition	SNOMED	YES	YES	NO
23808	Chronic peptic ulcer without hemorrhage, without perforation AND without obstruction	Condition	SNOMED	YES	YES	NO
2002608	Control of hemorrhage and suture of ulcer of stomach or duodenum	Procedure	ICD9Proc	NO	YES	NO
198798	Dieulafoy's vascular malformation	Condition	SNOMED	NO	YES	NO
4209746	Duodenal ulcer without hemorrhage AND without perforation	Condition	SNOMED	YES	YES	NO
4112183	Esophageal varices with bleeding, associated with another disorder	Condition	SNOMED	NO	YES	NO
2108900	Esophagogastroduodenoscopy, flexible, transoral; with control of bleeding, any method	Procedure	CPT4	NO	YES	NO
2108878	Esophagoscopy, flexible, transoral; with control of bleeding, any method	Procedure	CPT4	NO	YES	NO
4248429	Gastric ulcer without hemorrhage AND without perforation	Condition	SNOMED	YES	YES	NO
192671	Gastrointestinal hemorrhage	Condition	SNOMED	NO	YES	NO
4101104	Gastrojejunal ulcer without hemorrhage AND without perforation	Condition	SNOMED	YES	YES	NO
443530	Hematochezia	Condition	SNOMED	NO	YES	NO
4027663	Peptic ulcer	Condition	SNOMED	NO	YES	NO
4291028	Peptic ulcer without hemorrhage AND without perforation	Condition	SNOMED	YES	YES	NO
4103703	Melena	Condition	SNOMED	NO	YES	NO
4048608	Neonatal melena	Condition	SNOMED	NO	YES	NO

## Sheet: target 16631 diabetes
[Methods JH] New users of hypertension drug after 2013 - excluding diabetes and diabetes drugs
Cohort Entry Events
People with continuous observation of 365 days before event may enter the cohort when observing any of the following:
drug exposure of '[LEGEND HTN] Hypertension drugs' for the first time in the person's history, starting on or after January 1, 2013.
Limit cohort entry events to the earliest event per person.
Restrict entry events to with all of the following criteria:
having at least 1 condition occurrence of '[LEGEND HTN] Hypertensive disorder', starting between 365 days before and 0 days after cohort entry start date.
having no drug exposures of '[LEGEND HTN] Hypertension drugs', starting anytime prior to cohort entry start date.
Inclusion Criteria
1. No diabetes all time prior
Entry events with all of the following criteria:
having no condition occurrences of '[Methods JH] Diabetes', starting anytime on or before cohort entry start date.
having no observations of '[Methods JH] Diabetes', starting anytime on or before cohort entry start date.
having no procedure occurrences of '[Methods JH] Diabetes', starting anytime on or before cohort entry start date.
having no drug exposures of '[505] Diabetes Drugs', starting anytime on or before cohort entry start date.
Cohort Exit
The person exits the cohort at the end of continuous observation.
Cohort Eras
Entry events will be combined into cohort eras if they are within 0 days of each other.
Appendix 1: Concept Set Definitions
[505] Diabetes Drugs
Concept Id	Concept Name	Domain	Vocabulary	Excluded	Descendants	Mapped
21500148	Diabetic Therapy	Drug	ETC	NO	YES	NO
21600712	DRUGS USED IN DIABETES	Drug	ATC	NO	YES	NO
[LEGEND HTN] Hypertension drugs
Concept Id	Concept Name	Domain	Vocabulary	Excluded	Descendants	Mapped
1319998	Acebutolol	Drug	RxNorm	NO	YES	NO
1317967	aliskiren	Drug	RxNorm	NO	YES	NO
991382	Amiloride	Drug	RxNorm	NO	YES	NO
1332418	Amlodipine	Drug	RxNorm	NO	YES	NO
1314002	Atenolol	Drug	RxNorm	NO	YES	NO
40235485	azilsartan	Drug	RxNorm	NO	YES	NO
1335471	benazepril	Drug	RxNorm	NO	YES	NO
1322081	Betaxolol	Drug	RxNorm	NO	YES	NO
1338005	Bisoprolol	Drug	RxNorm	NO	YES	NO
932745	Bumetanide	Drug	RxNorm	NO	YES	NO
1351557	candesartan	Drug	RxNorm	NO	YES	NO
1340128	Captopril	Drug	RxNorm	NO	YES	NO
1346823	carvedilol	Drug	RxNorm	NO	YES	NO
1395058	Chlorthalidone	Drug	RxNorm	NO	YES	NO
1398937	Clonidine	Drug	RxNorm	NO	YES	NO
1328165	Diltiazem	Drug	RxNorm	NO	YES	NO
1363053	Doxazosin	Drug	RxNorm	NO	YES	NO
1341927	Enalapril	Drug	RxNorm	NO	YES	NO
1309799	eplerenone	Drug	RxNorm	NO	YES	NO
1346686	eprosartan	Drug	RxNorm	NO	YES	NO
1353776	Felodipine	Drug	RxNorm	NO	YES	NO
1363749	Fosinopril	Drug	RxNorm	NO	YES	NO
956874	Furosemide	Drug	RxNorm	NO	YES	NO
1344965	Guanfacine	Drug	RxNorm	NO	YES	NO
1373928	Hydralazine	Drug	RxNorm	NO	YES	NO
974166	Hydrochlorothiazide	Drug	RxNorm	NO	YES	NO
978555	Indapamide	Drug	RxNorm	NO	YES	NO
1347384	irbesartan	Drug	RxNorm	NO	YES	NO
1326012	Isradipine	Drug	RxNorm	NO	YES	NO
1386957	Labetalol	Drug	RxNorm	NO	YES	NO
1308216	Lisinopril	Drug	RxNorm	NO	YES	NO
1367500	Losartan	Drug	RxNorm	NO	YES	NO
1305447	Methyldopa	Drug	RxNorm	NO	YES	NO
907013	Metolazone	Drug	RxNorm	NO	YES	NO
1307046	Metoprolol	Drug	RxNorm	NO	YES	NO
1309068	Minoxidil	Drug	RxNorm	NO	YES	NO
1310756	moexipril	Drug	RxNorm	NO	YES	NO
1313200	Nadolol	Drug	RxNorm	NO	YES	NO
1314577	nebivolol	Drug	RxNorm	NO	YES	NO
1318137	Nicardipine	Drug	RxNorm	NO	YES	NO
1318853	Nifedipine	Drug	RxNorm	NO	YES	NO
1319880	Nisoldipine	Drug	RxNorm	NO	YES	NO
40226742	olmesartan	Drug	RxNorm	NO	YES	NO
1327978	Penbutolol	Drug	RxNorm	NO	YES	NO
1373225	Perindopril	Drug	RxNorm	NO	YES	NO
1345858	Pindolol	Drug	RxNorm	NO	YES	NO
1350489	Prazosin	Drug	RxNorm	NO	YES	NO
1353766	Propranolol	Drug	RxNorm	NO	YES	NO
1331235	quinapril	Drug	RxNorm	NO	YES	NO
1334456	Ramipril	Drug	RxNorm	NO	YES	NO
970250	Spironolactone	Drug	RxNorm	NO	YES	NO
1317640	telmisartan	Drug	RxNorm	NO	YES	NO
1341238	Terazosin	Drug	RxNorm	NO	YES	NO
942350	torsemide	Drug	RxNorm	NO	YES	NO
1342439	trandolapril	Drug	RxNorm	NO	YES	NO
904542	Triamterene	Drug	RxNorm	NO	YES	NO
1308842	valsartan	Drug	RxNorm	NO	YES	NO
1307863	Verapamil	Drug	RxNorm	NO	YES	NO
[LEGEND HTN] Hypertensive disorder
Concept Id	Concept Name	Domain	Vocabulary	Excluded	Descendants	Mapped
316866	Hypertensive disorder	Condition	SNOMED	NO	YES	NO
[Methods JH] Diabetes
Concept Id	Concept Name	Domain	Vocabulary	Excluded	Descendants	Mapped
4214679	Diabetes medication review	Procedure	SNOMED	NO	YES	NO
201820	Diabetes mellitus	Condition	SNOMED	NO	YES	NO
2617212	Diabetes outpatient self-management training services, group session (2 or more), per 30 minutes	Observation	HCPCS	NO	YES	NO
2617211	Diabetes outpatient self-management training services, individual, per 30 minutes	Observation	HCPCS	NO	YES	NO
442793	Diabetic complication	Condition	SNOMED	NO	YES	NO
435216	Disorder due to type 1 diabetes mellitus	Condition	SNOMED	NO	YES	NO
443732	Disorder due to type 2 diabetes mellitus	Condition	SNOMED	NO	YES	NO
443767	Disorder of eye due to diabetes mellitus	Condition	SNOMED	NO	YES	NO
2109560	Findings of dilated macular or fundus exam communicated to the physician or other qualified health care professional managing the diabetes care (EC)	Observation	CPT4	NO	YES	NO
4226354	Gangrene associated with diabetes mellitus	Condition	SNOMED	NO	YES	NO
2721462	Home management of gestational diabetes, includes administrative services, professional pharmacy services, care coordination, and all necessary supplies and equipment (drugs and nursing visits coded separately); per diem (do not use this code with any hom	Observation	HCPCS	NO	YES	NO
4029423	Hypoglycemic state due to diabetes mellitus	Condition	SNOMED	NO	YES	NO
3046418	Insulin dependent diabetes mellitus [Presence]	Observation	LOINC	NO	YES	NO
192279	Kidney disorder due to diabetes mellitus	Condition	SNOMED	NO	YES	NO
40480000	Multiple complications due to diabetes mellitus	Condition	SNOMED	NO	YES	NO
443730	Nervous system disorder due to diabetes mellitus	Condition	SNOMED	NO	YES	NO
321822	Peripheral vascular disorder due to diabetes mellitus	Condition	SNOMED	NO	YES	NO
42538560	Syndrome of infant of mother with gestational diabetes	Condition	SNOMED	NO	YES	NO
40484648	Type 1 diabetes mellitus uncontrolled	Condition	SNOMED	NO	YES	NO
40482801	Type II diabetes mellitus uncontrolled	Condition	SNOMED	NO	YES	NO

## Sheet: outcome 16474 diabetes
[Methods-JH] Diabetes
Cohort Entry Events
People enter the cohort when observing any of the following:
condition occurrence of '[Methods JH] Diabetes' for the first time in the person's history.
observation of '[Methods JH] Diabetes' for the first time in the person's history.
procedure occurrence of '[Methods JH] Diabetes' for the first time in the person's history.
Limit cohort entry events to the earliest event per person.
Cohort Exit
The person exits the cohort at the end of continuous observation.
Cohort Eras
Entry events will be combined into cohort eras if they are within 0 days of each other.
Appendix 1: Concept Set Definitions
[Methods JH] Diabetes
Concept Id	Concept Name	Domain	Vocabulary	Excluded	Descendants	Mapped
4214679	Diabetes medication review	Procedure	SNOMED	NO	YES	NO
201820	Diabetes mellitus	Condition	SNOMED	NO	YES	NO
2617212	Diabetes outpatient self-management training services, group session (2 or more), per 30 minutes	Observation	HCPCS	NO	YES	NO
2617211	Diabetes outpatient self-management training services, individual, per 30 minutes	Observation	HCPCS	NO	YES	NO
435216	Disorder due to type 1 diabetes mellitus	Condition	SNOMED	NO	YES	NO
443732	Disorder due to type 2 diabetes mellitus	Condition	SNOMED	NO	YES	NO
443767	Disorder of eye due to diabetes mellitus	Condition	SNOMED	NO	YES	NO
2109560	Findings of dilated macular or fundus exam communicated to the physician or other qualified health care professional managing the diabetes care (EC)	Observation	CPT4	NO	YES	NO
4226354	Gangrene associated with diabetes mellitus	Condition	SNOMED	NO	YES	NO
4029423	Hypoglycemic state due to diabetes mellitus	Condition	SNOMED	NO	YES	NO
3046418	Insulin dependent diabetes mellitus [Presence]	Observation	LOINC	NO	YES	NO
192279	Kidney disorder due to diabetes mellitus	Condition	SNOMED	NO	YES	NO
40480000	Multiple complications due to diabetes mellitus	Condition	SNOMED	NO	YES	NO
443730	Nervous system disorder due to diabetes mellitus	Condition	SNOMED	NO	YES	NO
321822	Peripheral vascular disorder due to diabetes mellitus	Condition	SNOMED	NO	YES	NO
42538560	Syndrome of infant of mother with gestational diabetes	Condition	SNOMED	NO	YES	NO
40484648	Type 1 diabetes mellitus uncontrolled	Condition	SNOMED	NO	YES	NO
40482801	Type II diabetes mellitus uncontrolled	Condition	SNOMED	NO	YES	NO
2721462	Home management of gestational diabetes, includes administrative services, professional pharmacy services, care coordination, and all necessary supplies and equipment (drugs and nursing visits coded separately); per diem (do not use this code with any hom	Observation	HCPCS	NO	YES	NO
442793	Diabetic complication	Condition	SNOMED	NO	YES	NO

## Sheet: target 16628 stroke
[Methods JH] New users of hypertension drug after 2013 - excluding stroke
Cohort Entry Events
People with continuous observation of 365 days before event may enter the cohort when observing any of the following:
drug exposure of '[LEGEND HTN] Hypertension drugs' for the first time in the person's history, starting on or after January 1, 2013.
Limit cohort entry events to the earliest event per person.
Restrict entry events to with all of the following criteria:
having at least 1 condition occurrence of '[LEGEND HTN] Hypertensive disorder', starting between 365 days before and 0 days after cohort entry start date.
having no drug exposures of '[LEGEND HTN] Hypertension drugs', starting anytime prior to cohort entry start date.
Inclusion Criteria
1. No stroke 60 days prior to index
Entry events having no condition occurrences of '[Methods JH] Stroke (ischemic or hemorrhagic)', starting between 60 days before and 0 days before cohort entry start date.
Cohort Exit
The person exits the cohort at the end of continuous observation.
Cohort Eras
Entry events will be combined into cohort eras if they are within 0 days of each other.
Appendix 1: Concept Set Definitions
[LEGEND HTN] Hypertension drugs
Concept Id	Concept Name	Domain	Vocabulary	Excluded	Descendants	Mapped
1319998	Acebutolol	Drug	RxNorm	NO	YES	NO
1317967	aliskiren	Drug	RxNorm	NO	YES	NO
991382	Amiloride	Drug	RxNorm	NO	YES	NO
1332418	Amlodipine	Drug	RxNorm	NO	YES	NO
1314002	Atenolol	Drug	RxNorm	NO	YES	NO
40235485	azilsartan	Drug	RxNorm	NO	YES	NO
1335471	benazepril	Drug	RxNorm	NO	YES	NO
1322081	Betaxolol	Drug	RxNorm	NO	YES	NO
1338005	Bisoprolol	Drug	RxNorm	NO	YES	NO
932745	Bumetanide	Drug	RxNorm	NO	YES	NO
1351557	candesartan	Drug	RxNorm	NO	YES	NO
1340128	Captopril	Drug	RxNorm	NO	YES	NO
1346823	carvedilol	Drug	RxNorm	NO	YES	NO
1395058	Chlorthalidone	Drug	RxNorm	NO	YES	NO
1398937	Clonidine	Drug	RxNorm	NO	YES	NO
1328165	Diltiazem	Drug	RxNorm	NO	YES	NO
1363053	Doxazosin	Drug	RxNorm	NO	YES	NO
1341927	Enalapril	Drug	RxNorm	NO	YES	NO
1309799	eplerenone	Drug	RxNorm	NO	YES	NO
1346686	eprosartan	Drug	RxNorm	NO	YES	NO
1353776	Felodipine	Drug	RxNorm	NO	YES	NO
1363749	Fosinopril	Drug	RxNorm	NO	YES	NO
956874	Furosemide	Drug	RxNorm	NO	YES	NO
1344965	Guanfacine	Drug	RxNorm	NO	YES	NO
1373928	Hydralazine	Drug	RxNorm	NO	YES	NO
974166	Hydrochlorothiazide	Drug	RxNorm	NO	YES	NO
978555	Indapamide	Drug	RxNorm	NO	YES	NO
1347384	irbesartan	Drug	RxNorm	NO	YES	NO
1326012	Isradipine	Drug	RxNorm	NO	YES	NO
1386957	Labetalol	Drug	RxNorm	NO	YES	NO
1308216	Lisinopril	Drug	RxNorm	NO	YES	NO
1367500	Losartan	Drug	RxNorm	NO	YES	NO
1305447	Methyldopa	Drug	RxNorm	NO	YES	NO
907013	Metolazone	Drug	RxNorm	NO	YES	NO
1307046	Metoprolol	Drug	RxNorm	NO	YES	NO
1309068	Minoxidil	Drug	RxNorm	NO	YES	NO
1310756	moexipril	Drug	RxNorm	NO	YES	NO
1313200	Nadolol	Drug	RxNorm	NO	YES	NO
1314577	nebivolol	Drug	RxNorm	NO	YES	NO
1318137	Nicardipine	Drug	RxNorm	NO	YES	NO
1318853	Nifedipine	Drug	RxNorm	NO	YES	NO
1319880	Nisoldipine	Drug	RxNorm	NO	YES	NO
40226742	olmesartan	Drug	RxNorm	NO	YES	NO
1327978	Penbutolol	Drug	RxNorm	NO	YES	NO
1373225	Perindopril	Drug	RxNorm	NO	YES	NO
1345858	Pindolol	Drug	RxNorm	NO	YES	NO
1350489	Prazosin	Drug	RxNorm	NO	YES	NO
1353766	Propranolol	Drug	RxNorm	NO	YES	NO
1331235	quinapril	Drug	RxNorm	NO	YES	NO
1334456	Ramipril	Drug	RxNorm	NO	YES	NO
970250	Spironolactone	Drug	RxNorm	NO	YES	NO
1317640	telmisartan	Drug	RxNorm	NO	YES	NO
1341238	Terazosin	Drug	RxNorm	NO	YES	NO
942350	torsemide	Drug	RxNorm	NO	YES	NO
1342439	trandolapril	Drug	RxNorm	NO	YES	NO
904542	Triamterene	Drug	RxNorm	NO	YES	NO
1308842	valsartan	Drug	RxNorm	NO	YES	NO
1307863	Verapamil	Drug	RxNorm	NO	YES	NO
[LEGEND HTN] Hypertensive disorder
Concept Id	Concept Name	Domain	Vocabulary	Excluded	Descendants	Mapped
316866	Hypertensive disorder	Condition	SNOMED	NO	YES	NO
[Methods JH] Stroke (ischemic or hemorrhagic)
Concept Id	Concept Name	Domain	Vocabulary	Excluded	Descendants	Mapped
40480002	Aphasia as late effect of cerebrovascular disease	Condition	SNOMED	NO	YES	NO
443551	Apraxia due to cerebrovascular accident	Condition	SNOMED	NO	YES	NO
43531622	Ataxia as sequela of cerebrovascular disease	Condition	SNOMED	NO	YES	NO
372924	Cerebral artery occlusion	Condition	SNOMED	NO	YES	NO
375557	Cerebral embolism	Condition	SNOMED	NO	YES	NO
443454	Cerebral infarction	Condition	SNOMED	NO	YES	NO
374384	Cerebral ischemia	Condition	SNOMED	NO	YES	NO
441874	Cerebral thrombosis	Condition	SNOMED	NO	YES	NO
381316	Cerebrovascular accident	Condition	SNOMED	NO	YES	NO
43530687	Dysarthria as late effects of cerebrovascular disease	Condition	SNOMED	NO	YES	NO
40479575	Dysphasia as late effect of cerebrovascular disease	Condition	SNOMED	NO	YES	NO
44782781	Hemiplegia and/or hemiparesis following stroke	Condition	SNOMED	NO	YES	NO
439847	Intracranial hemorrhage	Condition	SNOMED	NO	YES	NO
4071867	Neonatal cerebral leukomalacia	Condition	SNOMED	NO	YES	NO
443239	Precerebral arterial occlusion	Condition	SNOMED	NO	YES	NO
440392	Retinal vascular occlusion	Condition	SNOMED	NO	YES	NO
4112026	Sequelae of cerebral infarction	Condition	SNOMED	NO	YES	NO
4111721	Sequelae of intracerebral hemorrhage	Condition	SNOMED	NO	YES	NO
4111720	Sequelae of subarachnoid hemorrhage	Condition	SNOMED	NO	YES	NO
43530623	Sequela of cerebrovascular accident	Condition	SNOMED	NO	YES	NO
43530606	Sequela of traumatic intracranial hemorrhage	Condition	SNOMED	NO	YES	NO
373503	Transient cerebral ischemia	Condition	SNOMED	NO	YES	NO
443605	Vascular dementia	Condition	SNOMED	NO	YES	NO
376714	Vertebrobasilar artery syndrome	Condition	SNOMED	NO	YES	NO
374060	Acute ill-defined cerebrovascular disease	Condition	SNOMED	NO	YES	NO

## Sheet: outcome 16451 stroke
[LEGEND HTN] Stroke (ischemic or hemorrhagic) events, no IP or ER visit
Cohort Entry Events
People enter the cohort when observing any of the following:
condition occurrences of '[Methods JH] Stroke (ischemic or hemorrhagic)'.
Cohort Exit
The cohort end date will be offset from index event's start date plus 7 days.
Cohort Eras
Entry events will be combined into cohort eras if they are within 180 days of each other.
Appendix 1: Concept Set Definitions
[Methods JH] Stroke (ischemic or hemorrhagic)
Concept Id	Concept Name	Domain	Vocabulary	Excluded	Descendants	Mapped
443551	Apraxia due to cerebrovascular accident	Condition	SNOMED	NO	YES	NO
372924	Cerebral artery occlusion	Condition	SNOMED	NO	YES	NO
375557	Cerebral embolism	Condition	SNOMED	NO	YES	NO
443454	Cerebral infarction	Condition	SNOMED	NO	YES	NO
374384	Cerebral ischemia	Condition	SNOMED	NO	YES	NO
441874	Cerebral thrombosis	Condition	SNOMED	NO	YES	NO
381316	Cerebrovascular accident	Condition	SNOMED	NO	YES	NO
44782781	Hemiplegia and/or hemiparesis following stroke	Condition	SNOMED	NO	YES	NO
439847	Intracranial hemorrhage	Condition	SNOMED	NO	YES	NO
4071867	Neonatal cerebral leukomalacia	Condition	SNOMED	NO	YES	NO
443239	Precerebral arterial occlusion	Condition	SNOMED	NO	YES	NO
4112026	Sequelae of cerebral infarction	Condition	SNOMED	NO	YES	NO
4111721	Sequelae of intracerebral hemorrhage	Condition	SNOMED	NO	YES	NO
4111720	Sequelae of subarachnoid hemorrhage	Condition	SNOMED	NO	YES	NO
43530623	Sequela of cerebrovascular accident	Condition	SNOMED	NO	YES	NO
43530606	Sequela of traumatic intracranial hemorrhage	Condition	SNOMED	NO	YES	NO
373503	Transient cerebral ischemia	Condition	SNOMED	NO	YES	NO
443605	Vascular dementia	Condition	SNOMED	NO	YES	NO
440392	Retinal vascular occlusion	Condition	SNOMED	NO	YES	NO
376714	Vertebrobasilar artery syndrome	Condition	SNOMED	NO	YES	NO
40479575	Dysphasia as late effect of cerebrovascular disease	Condition	SNOMED	NO	YES	NO
43530687	Dysarthria as late effects of cerebrovascular disease	Condition	SNOMED	NO	YES	NO
43531622	Ataxia as sequela of cerebrovascular disease	Condition	SNOMED	NO	YES	NO
40480002	Aphasia as late effect of cerebrovascular disease	Condition	SNOMED	NO	YES	NO
374060	Acute ill-defined cerebrovascular disease	Condition	SNOMED	NO	YES	NO
